# Supplementary material for: Nonstructural Proteins Are Preferential Positive Selection Targets in Zika Virus and Related Flaviviruses
Source: PubMed Central journal article supplement (PMC5010288; doi:10.1371/journal.pntd.0004978), 2016-09-02
Supplement: pntd.0004978.s002.pdf [file pntd.0004978.s002.pdf]

**S1 Table.** List of viral sequences.

| <b>Species</b> | <b>NCBI<br/>Accession<br/>Number</b> | <b>Strain Name (genotype)</b> | <b>Country</b> | <b>Host</b>            | <b>Collection<br/>Date</b> |
|----------------|--------------------------------------|-------------------------------|----------------|------------------------|----------------------------|
| ZIKV           | KU365778                             | BeH819015                     | Brazil         | <i>Homo sapiens</i>    | 2015                       |
| ZIKV           | KU365777                             | BeH818995                     | Brazil         | <i>Homo sapiens</i>    | 2015                       |
| ZIKV           | KU501217                             | 8375                          | Guatemala      | <i>Homo sapiens</i>    | 2015                       |
| ZIKV           | KU501216                             | 103344*                       | Guatemala      | <i>Homo sapiens</i>    | 2015                       |
| ZIKV           | KU501215                             | PRVABC59*                     | Puerto Rico    | <i>Homo sapiens</i>    | 2015                       |
| ZIKV           | KU647676                             | MRS_OPY_Martinique_PaRi_2015* | Martinique     | <i>Homo sapiens</i>    | 2015                       |
| ZIKV           | KU681082                             | CPC-0740*                     | Philippines    | <i>Homo sapiens</i>    | 2012                       |
| ZIKV           | KU681081                             | SV0127/14*                    | Thailand       | <i>Homo sapiens</i>    | 2014                       |
| ZIKV           | KU707826                             | SSABR1                        | Brazil         | <i>Homo sapiens</i>    | 2015                       |
| ZIKV           | KU527068                             | Natal RGN*                    | Brazil         | <i>Homo sapiens</i>    | 2015                       |
| ZIKV           | KU509998                             | Haiti/1225/2014*              | Haiti          | <i>Homo sapiens</i>    | 2014                       |
| ZIKV           | KU820899                             | ZJ03                          | China          | <i>Homo sapiens</i>    | 2016                       |
| ZIKV           | KU820897                             | FLR                           | Colombia       | <i>Homo sapiens</i>    | 2015                       |
| ZIKV           | KU729217                             | BeH823339                     | Brazil         | <i>Homo sapiens</i>    | 2015                       |
| ZIKV           | KU729218                             | BeH828305                     | Brazil         | <i>Homo sapiens</i>    | 2015                       |
| ZIKV           | KU761564                             | GDZ16001                      | China          | <i>Homo sapiens</i>    | 2016                       |
| ZIKV           | KU744693                             | VE_Ganxian                    | China          | <i>Homo sapiens</i>    | 2016                       |
| ZIKV           | KU740184                             | GD01                          | China          | <i>Homo sapiens</i>    | 2016                       |
| ZIKV           | KU497555                             | Brazil-ZKV2015                | Brazil         | <i>Homo sapiens</i>    | 2015                       |
| ZIKV           | EU545988                             | EC YAP*                       | Micronesia     | <i>Homo sapiens</i>    | 2007                       |
| ZIKV           | AY632535                             | MR 766*                       | Uganda         | sentinel <i>Rhesus</i> | N.A.                       |
| ZIKV           | HQ234499                             | P6-740*                       | Malaysia       | <i>Aedes aegypti</i>   | 1966                       |
| ZIKV           | HQ234500                             | IbH_30656*                    | Nigeria        | <i>Homo sapiens</i>    | 1968                       |
| ZIKV           | JN860885                             | FSS13025*                     | Cambodia       | <i>Homo sapiens</i>    | 2010                       |

|       |          |                                           |                          |                            |      |
|-------|----------|-------------------------------------------|--------------------------|----------------------------|------|
| ZIKV  | KF268948 | ARB13565*                                 | Central African Republic | <i>Aedes africanus</i>     | 1976 |
| ZIKV  | KF268949 | ARB15076*                                 | Central African Republic | <i>Aedes opok</i>          | N.A. |
| ZIKV  | KF268950 | ARB7701                                   | Central African Republic | <i>Aedes africanus</i>     | N.A. |
| ZIKV  | KF993678 | PLCaI_ZV*                                 | Canada                   | <i>Homo sapiens</i>        | 2013 |
| ZIKV  | KF383115 | ArB1362                                   | Central African Republic | <i>Aedes africanus</i>     | 1968 |
| ZIKV  | KF383116 | ArD7117*                                  | Senegal                  | <i>Aedes luteocephalus</i> | 1968 |
| ZIKV  | KF383117 | ArD128000                                 | Senegal                  | <i>Aedes luteocephalus</i> | 1997 |
| ZIKV  | KF383118 | ArD157995*                                | Senegal                  | <i>Aedes dalzieli</i>      | 2001 |
| ZIKV  | KF383119 | ArD158084                                 | Senegal                  | <i>Aedes dalzieli</i>      | 2001 |
| ZIKV  | KJ776791 | H/PF/2013*                                | French Polynesia         | <i>Homo sapiens</i>        | 2013 |
| ZIKV  | KU321639 | ZikaSPH2015                               | Brazil                   | <i>Homo sapiens</i>        | 2015 |
| ZIKV  | KU312312 | Z1106033*                                 | Suriname                 | <i>Homo sapiens</i>        | 2015 |
| ZIKV  | HQ234501 | ArD_41519*                                | Senegal                  | <i>Aedes africanus</i>     | 1984 |
| ZIKV  | KU365780 | BeH815744*                                | Brazil                   | <i>Homo sapiens</i>        | 2015 |
| ZIKV  | KU365779 | BeH819966                                 | Brazil                   | <i>Homo sapiens</i>        | 2015 |
| DENV1 | EU081262 | DENV-1/SG/05K4173DK1/2005 (I)             | Singapore                | <i>Homo sapiens</i>        | 2005 |
| DENV1 | DQ285561 | DENV-1 Seychelles 1480/04 (IV)            | Seychelles               | <i>Homo sapiens</i>        | 2004 |
| DENV1 | AF514889 | DENV-1/AR/297arg00/2000 (V)               | Argentina                | <i>Homo sapiens</i>        | 2000 |
| DENV2 | AY776328 | DENV-2/TW/Taiwan-1008DHF (Cosmopolitan)   | Taiwan                   | N.A.                       | N.A. |
| DENV2 | AY702034 | DENV-2/CU/Cuba13-97/1997 (American/Asian) | Cuba                     | <i>Homo sapiens</i>        | 1997 |
| DENV2 | AF169681 | DENV-2/TH/ThNH55-93/1993 (Asian II)       | Thailand                 | <i>Homo sapiens</i>        | 1993 |
| DENV3 | AY744682 | DENV-3/PF/PF92-2956/1992 (I)              | French Polynesia         | <i>Homo sapiens</i>        | 1992 |
| DENV3 | DQ675526 | DENV-3/TW/98TW388/1998 (II)               | Taiwan                   | <i>Homo sapiens</i>        | 1998 |
| DENV3 | AY679147 | DENV-3/BR/BR74886-02/2002 (III)           | Brazil                   | <i>Homo sapiens</i>        | 2002 |
| DENV4 | GQ868594 | DENV-4/PH/BID-V3361/1956 (I)              | Philippines              | <i>Homo sapiens</i>        | 1956 |
| DENV4 | JN983813 | DENV-4 Br246RR/10 (II)                    | Brazil                   | <i>Homo sapiens</i>        | 2010 |

|      |           |              |              |                   |      |
|------|-----------|--------------|--------------|-------------------|------|
| KEDV | AY632540  | DakAar D1470 | Senegal      | <i>Aedes spp.</i> | N.A. |
| SPOV | NC_029055 | SM-6 V-1     | South Africa | N.A.              | N.A. |

---

\* ZIKV strains used in both flavivirus and ZIKV analyses.

ZIKV: Zika Virus; DENV: dengue Virus; KEDV: Kedougou Virus; SPOV: Spondweni Virus; N.A. Not Available.
