# Supplementary material for: Nonstructural Proteins Are Preferential Positive Selection Targets in Zika Virus and Related Flaviviruses
Source: PubMed Central journal article supplement (PMC5010288; doi:10.1371/journal.pntd.0004978), 2016-09-02
Supplement: pntd.0004978.s004.pdf [file pntd.0004978.s004.pdf]

**S3 Table. Percentage of GUIDANCE-masked codons in each protein region.** We considered codons masked in at least one sequence.

|               | <b>Protein region</b> | <b>Percentage</b> |
|---------------|-----------------------|-------------------|
| Structural    | C                     | 15.5              |
|               | prM                   | 6.0               |
|               | E                     | 7.9               |
| Nonstructural | NS1                   | 6.1               |
|               | NS2A                  | 36.1              |
|               | NS2B                  | 20.1              |
|               | NS3                   | 3.3               |
|               | NS4A                  | 7.1               |
|               | 2K                    | 54.2              |
|               | NS4B                  | 12.9              |
| NS5           | 5.2                   |                   |
